# Supplementary material
Source: PubMed Central journal article supplement (PMC463076)
Supplement: gb-2004-5-6-r43-s1.pdf [file gb-2004-5-6-r43-s1.pdf]

## Additional Data File 1

Detailed text profiles for clusters {B, C, D, E, F, G, H, J, and K} in

Eisen M, Spellman P, Brown P, Botstein D: **Cluster analysis and display of genome-wide expression patterns.** *Proc Natl Acad Sci USA* 1998, 95:14863-14868.

For each cluster, the second column contains the top 10 scoring keywords extracted from MEDLINE abstracts that are associated in SGD to the genes of that cluster (listed in column 1). The last column contains the top 10 keywords (provided that many are available) derived from the GO annotations for the gene cluster under consideration.

In clusters B and C we observe the complementary nature of MEDLINE information. Terms extracted from MEDLINE such as 'spindle pole body', 'cytokinesis' and 'anaphase promotor complex' are more reminiscent of the overall function of cluster B than the most of the less-specific GO-extracted terms such as 'cytoskeleton', 'protein binding' and 'bud neck'. One exception is the GO-term 'microtubuli nucleation', which contributes to the biogenesis of the microtubule cytoskeleton. For cluster C, the difference is even more pronounced as the GO term 'degrad' is the only one referring (vaguely) to the asserted proteasome function of this cluster. For the remaining clusters, terms extracted from MEDLINE and GO refer to the same biological function. Hence, term-based analysis of literature can be valuable to complement annotations in public databases.

| SGD yeast gene names                                  | MEDLINE-based profiles | GO-annotation -based profiles |
|-------------------------------------------------------|------------------------|-------------------------------|
| <b>CLUSTER B (spindle pole assembly and function)</b> |                        |                               |
| stu2                                                  | spindl_pole_bodi       | cytoskeleton                  |
| dhs1                                                  | cyclin                 | cyclin                        |
| bnr1                                                  | bud                    | axial_bud                     |
| spc42                                                 | mitosi                 | microtubul_nucleat            |
| cnm67                                                 | cytokinesi             | protein_bind                  |
| clb4                                                  | septin                 | g2                            |
| cdc10                                                 | spindl                 | bud_neck                      |
| cdc3                                                  | cell_cycl              | division                      |
| clb3                                                  | anaphas_promot_complex | degrad                        |
| apc4                                                  | anaphas                | g1_transition                 |
| cdc16                                                 |                        |                               |
| <b>CLUSTER C (proteasome)</b>                         |                        |                               |
| rpn11                                                 | proteasom              | degrad                        |
| ufd1                                                  | 26s_proteasom          | endopeptidas                  |

|                                  |                                       |                           |
|----------------------------------|---------------------------------------|---------------------------|
| rpn9                             | regulatori                            | cytoplasm                 |
| rpt1                             | degrad                                | nuclear                   |
| rpt6                             | ubiquitin                             |                           |
| pre4                             | particl                               |                           |
| rpn6                             | 19s                                   |                           |
| rpt4                             | proteolysi                            |                           |
| rpn7                             | core                                  |                           |
| rpn3                             | similar                               |                           |
| pup2                             |                                       |                           |
| scl1                             |                                       |                           |
| pre5                             |                                       |                           |
| pre9                             |                                       |                           |
| pre1                             |                                       |                           |
| pre2                             |                                       |                           |
| pre3                             |                                       |                           |
| pre10                            |                                       |                           |
| pup1                             |                                       |                           |
| pre6                             |                                       |                           |
| pre7                             |                                       |                           |
| rpn10                            |                                       |                           |
| rpt3                             |                                       |                           |
| prt5                             |                                       |                           |
| rpn12                            |                                       |                           |
| rpn5                             |                                       |                           |
| rpn8                             |                                       |                           |
| <b>CLUSTER D (mRNA splicing)</b> |                                       |                           |
| pop6                             | mitochondri                           | mrna_splice               |
| caf16                            | rna                                   | nuclear                   |
| mrs1                             | splice                                | transport                 |
| smd3                             | mrna                                  | mrna_process              |
| taf40                            | interact                              | rrna_process              |
| pet309                           | nuclear                               | snrnp_recycl              |
| pzf1                             | transcript                            | gtpase                    |
| ysh1                             | u6                                    | pre_mrna_splice_factor    |
| cbp1                             | u4                                    | mitochondri_genom_mainten |
| prp24                            | matur                                 | integr_membran_protein    |
| std1                             |                                       | mitochondri               |
| mgm1                             |                                       |                           |
| prp19                            |                                       |                           |
| sls1                             |                                       |                           |
| <b>CLUSTER E (glycolysis)</b>    |                                       |                           |
| tpt1                             | glyceraldehyd_3_phosphat_dehydrogenas | gluconeogenesi            |
| gpm1                             | glycolyt                              | glycolysi                 |
| pgk1                             | pyruv_decarboxylas                    | cytoplasm                 |

|                                           |                     |                                           |
|-------------------------------------------|---------------------|-------------------------------------------|
| tdh3                                      | glucos              | glyceraldehyd_3_phosphat_dehyd<br>rogenas |
| tdh2                                      | enzym               | phosphoryl                                |
| eno2                                      | ethanol             | transketolas                              |
| tdh1                                      | carbon              | hexokinas                                 |
| fba1                                      | glycolysi           | phosphoglycer_kinas                       |
| tkl1                                      | ferment             | phosphoglycer_mutas                       |
| pdc5                                      | pyruv_kinas         | pyruv_kinas                               |
| pdc6                                      |                     |                                           |
| pdc1                                      |                     |                                           |
| cdc19                                     |                     |                                           |
| hvk2                                      |                     |                                           |
| tye7                                      |                     |                                           |
| pfk1                                      |                     |                                           |
| acs2                                      |                     |                                           |
| <b>CLUSTER F (mitochondrial ribosome)</b> |                     |                                           |
| dbi56                                     | mitochondri_ribosom | mitochondri                               |
| mss51                                     | mitochondri         | biosynthesi                               |
| msf1                                      | mrp                 | mitochondri_matrix                        |
| mrps5                                     | protein_biosynthesi | protein_biosynthesi                       |
| msm1                                      | commun              | peptidyltransferas                        |
| cox10                                     | cytoplasm           | ribosom                                   |
| msk1                                      | translat            | respir                                    |
| mef1                                      | individu            | mrna_process                              |
| none                                      | ribosom             | mitochondri_intermembran_space            |
| mrpl35                                    | similar             | cytochrom_c_oxidasi_biogenesi             |
| mrp7                                      |                     |                                           |
| none                                      |                     |                                           |
| cox17                                     |                     |                                           |
| mrp17                                     |                     |                                           |
| mrpl6                                     |                     |                                           |
| mrpl8                                     |                     |                                           |
| rml2                                      |                     |                                           |
| mrpl13                                    |                     |                                           |
| mrpl9                                     |                     |                                           |
| pet123                                    |                     |                                           |
| ppa2                                      |                     |                                           |
| img2                                      |                     |                                           |
| <b>CLUSTER G (ATP synthesis)</b>          |                     |                                           |
| sds22                                     | synthas             | atpas                                     |
| cox4                                      | atp                 | transport                                 |
| cox13                                     | mitochondri         | cytochrom_c_oxidasi                       |
| cox8                                      | assembli            | mitochondri                               |
| atp1                                      | cytochrom_c_oxidasi | mitochondri_inner_membran                 |
| atp5                                      | oxid_phosphoryl     | nuclear                                   |

|                                                             |                     |                                |
|-------------------------------------------------------------|---------------------|--------------------------------|
| atp2                                                        | atpas               | ubiquinol_cytochrom_c_reductas |
| cox12                                                       | f                   |                                |
| atp4                                                        | growth              |                                |
| atp17                                                       | aerob               |                                |
| atp14                                                       |                     |                                |
| atp3                                                        |                     |                                |
| atp16                                                       |                     |                                |
| atp7                                                        |                     |                                |
| qcr8                                                        |                     |                                |
| <b>CLUSTER H (chromatin structure)</b>                      |                     |                                |
| hht1                                                        | histon              | nuclear                        |
| hht2                                                        | h4                  | disassembli                    |
| hhf2                                                        | h2a                 | chromatin_assembli             |
| hhf1                                                        | h3                  | dna_bind                       |
| htb1                                                        | h2b                 |                                |
| hta2                                                        | nucleosom           |                                |
| hta1                                                        | chromatin           |                                |
| htb2                                                        | core                |                                |
|                                                             | tail                |                                |
|                                                             | transcript          |                                |
| <b>CLUSTER J (DNA replication)</b>                          |                     |                                |
| cdc54                                                       | mcm                 | atp_depend_dna_helicas         |
| mcm3                                                        | dna_replic          | dna_replic_initi               |
| mcm2                                                        | replic              | cell_cycl                      |
| cdc47                                                       | initi               | nuclear                        |
| dbf2                                                        | origin              |                                |
|                                                             | cell_cycl           |                                |
|                                                             | phase               |                                |
|                                                             | mainten             |                                |
|                                                             | mitosi              |                                |
|                                                             | chromatin           |                                |
| <b>CLUSTER K (tricarboxylic acid cycle and respiration)</b> |                     |                                |
| por1                                                        | cytochrom           | mitochondri_inner_membran      |
| none                                                        | succin_dehydrogenas | ubiquinol_cytochrom_c_reductas |
| sdh1                                                        | mitochondri         | ubiquinon                      |
| ndi1                                                        | carbon              | succin_dehydrogenas_complex    |
| qcr7                                                        | respiratori         | succin                         |
| cox6                                                        | oxid                | cytochrom_c_oxidas             |
| rip1                                                        | reductas            | malic_enzym                    |
| cox15                                                       | respir              | mitochondri_outer_membran      |
| cor1                                                        | cytochrom_bc        | cytochrom_c_oxidas_biogenesi   |

|      |          |                     |
|------|----------|---------------------|
| sdh3 | assembli | acetyl_coa_hydrolas |
| sdh4 |          |                     |
| sdh2 |          |                     |
| mdh1 |          |                     |
| qcr6 |          |                     |
| cyt1 |          |                     |
| ach1 |          |                     |
