# Supplementary material
Source: PubMed Central journal article supplement (PMC463076)
Supplement: gb-2004-5-6-r43-s2.pdf [file gb-2004-5-6-r43-s2.pdf]

## Additional Data File 2

Comparison between profiles from

Chaussabel D, Sher A: **Mining microarray expression data by literature proling.** *Genome Biol* 2002, 3:1-16.

We re-clustered the 69 genes present in the clustergram in Figure 6 from Chaussabel *et al.* For each of the resulting clusters we constructed a text profile using our GO-based vocabulary. Complementary to the manuscript, we include profiles of clusters *f-g* below. Although profiles of clusters *a-e* are present in the manuscript, we reprint all info here, *along with the LocusLink ids used*, for the reader's convenience.

In the first two columns the HUGO names and corresponding LocusLink identifiers are provided. The terms extracted by Chaussabel *et al.* are shown in column three and contrasted to the TXTGate terms in column four. The TXTGate profiles are descriptive and match the terms from the initial analysis well.

| HUGO Names         | LocusLink ids | Terms Chaussabel | TXTGate terms (GO vocabulary)    |
|--------------------|---------------|------------------|----------------------------------|
| <b>CLUSTER (a)</b> |               |                  |                                  |
| LPL                | 4023          | Lipoprotein      | lipoprotein                      |
| CD36L1             | 949           | Density          | lipas                            |
| LDLR               | 3949          | Cholesterol      | ldl                              |
|                    |               | Lipid            | ldl_receptor                     |
|                    |               | Adipose          | cholesterol                      |
|                    |               |                  | hdl                              |
|                    |               |                  | scaveng_receptor                 |
|                    |               |                  | high_densiti_lipoprotein         |
|                    |               |                  | low_densiti_lipoprotein_receptor |
|                    |               |                  | low_densiti_lipoprotein          |
|                    |               |                  | plasma                           |
|                    |               |                  | lipid                            |
|                    |               |                  | ...                              |
|                    |               |                  | densiti                          |
| <b>CLUSTER (b)</b> |               |                  |                                  |
| UPA                | 118471        | Invasive         | metalloproteinas                 |
| PLAUR              | 5329          | Invasion         | matrix                           |
| SERPIN             | 5265          | Metastasis       | metalloendopeptidas              |
| MMP1               | 4312          | UPAR             | collagenas                       |
| MMP10              | 4319          | UPA              | extracellular_matrix             |
| MMP14              | 4323          | Plasminogen      | alpha                            |
| SPARC              | 6678          | Urokinase-type   | upar                             |
|                    |               | Urokinase        | plasminogen_activ                |
|                    |               | Plasmin          | interstiti                       |
|                    |               | Activator        | invasion                         |
|                    |               | Collagenase      | stromelysin_2                    |
|                    |               | Collagen         | tumor                            |

|                   |                      |
|-------------------|----------------------|
| Matrix            | gelatinas            |
| MMP               | stromelysin_1        |
| Metalloproteinase | mmp                  |
| Molecule-1        | urokinas             |
| Adhesion          | inhibitor            |
| Vascular          | increas              |
| Endothelial       | cell_surfac          |
|                   | invas                |
|                   | ...                  |
|                   | matrix               |
|                   | extracellular_matrix |
|                   | activ                |
|                   | collagen             |
|                   | cell_invasion        |
|                   | vascular             |
|                   | cell_adhesion        |
|                   | adhesion             |
|                   | endotheli            |
|                   | plasmin              |
|                   | plasminogen          |

| CLUSTER (c) |      |                  |                       |
|-------------|------|------------------|-----------------------|
| AMPD3       | 272  | Adenosine        | purinerg              |
| ADA         | 100  | A2A              | adenosin              |
| ADORA2A     | 135  | A1               | deaminas              |
| ADORA3      | 140  | Antagonist       | p2                    |
| P2RX        |      | Agonist          | p2x                   |
| P2RX1       | 5023 | NM               | p1                    |
| P2RX7       | 5027 |                  | agonist               |
|             |      |                  | receptor              |
|             |      |                  | adenosin_receptor     |
|             |      |                  | ada                   |
|             |      |                  | nucleosid             |
|             |      |                  | a2a                   |
|             |      |                  | atp                   |
|             |      |                  | a3_adenosin_receptor  |
|             |      |                  | triphosph             |
|             |      |                  | a3                    |
|             |      |                  | a2a_adenosin_receptor |
|             |      |                  | extracellular         |
|             |      |                  | erythrocyt            |
|             |      |                  | antagonist            |
|             |      |                  | select                |
|             |      |                  | ion_channel           |
|             |      |                  | amp                   |
|             |      |                  | a1                    |
| CLUSTER (d) |      |                  |                       |
| IP10        | 3627 | Interferon       | tumor_necrosi_factor  |
| MIP1A       | 6348 | IFN-alpha        | cytokin               |
| MIP1B       | 6351 | IFN              | induc                 |
| IL8         | 3576 | Interferon-gamma | interferon            |
| STAT4       | 6775 | IFN-gamma        | inflammatori          |

|          |       |           |                  |
|----------|-------|-----------|------------------|
| IL12B    | 3593  | Inducible | antigen          |
| TNFRSF9  | 3604  |           | lymphocyt_activ  |
| TNFSF9   | 8744  |           | stimul           |
| SLAM     | 6504  |           | chemokin         |
| TNFRSF5  | 958   |           | monocyt          |
| CD83     | 9308  |           | induct           |
| FGL2     | 10875 |           | ...              |
| TNFRSF1A | 7132  |           | ifn              |
| TNF      | 7124  |           | interferon_gamma |
| CD14     | 929   |           | interferon_alpha |
| PTX3     | 5806  |           |                  |
| IL6      | 3569  |           |                  |
| MX1      | 4599  |           |                  |
| GBP1     | 2633  |           |                  |
| ISG15    | 9636  |           |                  |
| IRF1     | 3659  |           |                  |
| INDO     | 3620  |           |                  |

|                    |  |  |  |
|--------------------|--|--|--|
| <b>CLUSTER (e)</b> |  |  |  |
|--------------------|--|--|--|

|         |      |            |             |
|---------|------|------------|-------------|
| CKB     | 1152 | Population | purinerg    |
| AMPD3   | 272  | Frequency  | adenosin    |
| ADA     | 100  | Allele     | deaminas    |
| ADORA2A | 135  | Unrelated  | lipoprotein |
| ADORA3  | 140  | Families   | determin    |
| P2RX    |      | Recessive  | chromosom   |
| P2RX1   | 5023 | Autosomal  | exon        |
| P2RX7   | 5027 | Disorder   | p2          |
| GEM     | 2669 | Severe     | pair        |
| ARHH    | 399  | Patient    | dna         |
| LPL     | 4023 | Deficiency | receptor    |
| CD36L1  | 949  |            | region      |
| LDLR    | 3949 |            | diseas      |
| BF      | 629  |            | map         |
| GALC    | 2581 |            | line        |
| LAMB3   | 3914 |            | result      |
| GJB2    | 2706 |            |             |
| TGFBI   | 7045 |            |             |
| JAG1    | 182  |            |             |
| DSCR1   | 1827 |            |             |

|                    |  |  |  |
|--------------------|--|--|--|
| <b>CLUSTER (f)</b> |  |  |  |
|--------------------|--|--|--|

|        |       |                 |                   |
|--------|-------|-----------------|-------------------|
| CCR7   | 1236  | Chemokine       | chemokin          |
| MCP1   | 6347  | Chemotactic     | inflammatori      |
| RANTES | 6352  | Chemoattractant | monocyt           |
| IP10   | 3627  | Infiltration    | cytokin           |
| MIP1A  | 6348  | Migration       | macrophag         |
| MIP1B  | 6351  | CC              | il_8              |
| IL8    | 3576  | Chemotaxis      | chemokin_receptor |
| MGSA   | 2919  | Neutrophil      | chemoattract      |
| MIP2A  | 2920  | IL-8            | induc             |
| MIP2B  | 2921  | Protein-1       | stimul            |
| PBEF   | 10135 | MCP-1           | phorbol           |
|        |       | Monocyte        | blood             |

cc  
 leukocyt  
 lymphocyt  
 lipopolysaccharid  
 chemotaxi  
 ...  
 neutrophil  
 migrat  
 neutrophil\_activ  
 cell\_migrat  
 neutrophil\_chemotaxi

| CLUSTER (g) |       |                    |                      |
|-------------|-------|--------------------|----------------------|
| BIRC3       | 330   | Interleukin        | tumor_necrosi_factor |
| IER3        | 8870  | IL                 | inflammatori         |
| CFLAR       | 8837  | IL-1beta           | cytokin              |
| TRAF1       | 7185  | IL-1               | monocyt              |
| TNFAIP3     | 7128  | IL-6               | antigen              |
| NFKBIA      | 4792  | Inflammation       | chemokin             |
| IL15RA      | 3601  | Cytokine           | induc                |
| STAT5A      | 6776  | LPS                | receptor             |
| CCR7        | 1236  | Lipopolysaccharide | lymphocyt            |
| MCP1        | 6347  | TNF-alpha          | macrophag            |
| RANTES      | 6352  | TNF                | ...                  |
| IP10        | 3627  | Bacterial          | interleukin_1        |
| MIP1A       | 6348  |                    | lipopolysaccharid    |
| MIP1B       | 6351  |                    | interleukin          |
| IL8         | 3576  |                    | bacteri              |
| STAT4       | 6775  |                    | inflammatori_cell    |
| IL12B       | 3593  |                    |                      |
| TNFRSF9     | 3604  |                    |                      |
| TNFSF9      | 8744  |                    |                      |
| SLAM        | 6504  |                    |                      |
| TNFRSF5     | 958   |                    |                      |
| CD83        | 9308  |                    |                      |
| FGL2        | 10875 |                    |                      |
| TNFRSF1A    | 7132  |                    |                      |
| TNF         | 7124  |                    |                      |
| CD14        | 929   |                    |                      |
| PTX3        | 5806  |                    |                      |
| IL6         | 3569  |                    |                      |
| IL1RN       | 3557  |                    |                      |
| CD163       | 9332  |                    |                      |
| MGSA        | 2919  |                    |                      |
| MIP2A       | 2920  |                    |                      |
| MIP2B       | 2921  |                    |                      |
| PBEF        | 10135 |                    |                      |
| CD44        | 960   |                    |                      |
| PECAM1      | 5175  |                    |                      |
| ICAM1       | 3383  |                    |                      |
