# Supplementary material
Source: PubMed Central journal article supplement (PMC463076)
Supplement: gb-2004-5-6-r43-s3.pdf [file gb-2004-5-6-r43-s3.pdf]

## Additional Data File 3

Additional information for the case study involving genes related to colon and colorectal cancer. The following table provides HUGO names, LocusLink ids, Synonyms symbols and EnsEMBL identifiers.

| HUGO Names | LocusLink ids | Alternative names   | EnsEMBL         |
|------------|---------------|---------------------|-----------------|
| APC        | 324           | GS, FPC             | ENSG00000134982 |
| AXIN2      | 8313          |                     | ENSG00000168646 |
| BAX        | 581           |                     | ENSG00000087088 |
| BCL10      | 8915          |                     | ENSG00000142867 |
| BRAF       | 673           |                     | ENSG00000157764 |
| BUB1       | 699           |                     | ENSG00000169679 |
| CTNNB1     | 1499          |                     | ENSG00000168036 |
| DCC        | 1630          |                     | ENSG00000172155 |
| FGFR3      | 2261          | ACH                 | ENSG00000068078 |
| KRAS2      | 3845          | RASK2               | ENSG00000133703 |
| MCC        | 4163          |                     | ENSG00000171444 |
| MLH1       | 4292          | COCA2, HNPCC2       | ENSG00000076242 |
| MLH3       | 27030         | HNPCC               | ENSG00000119684 |
| MSH2       | 4436          | FCC1, COCA1, HNPCC1 | ENSG00000095002 |
| MSH6       | 2956          | GTBP, HNPCC5        | ENSG00000116062 |
| NRAS       | 4893          |                     | ENSG00000168638 |
| PDGFRL     | 5157          | PDGRL, PRLTS        | ENSG00000104213 |
| PMS1       | 5378          | HNPCC3, PMSL1       | ENSG00000064933 |
| PMS2       | 5395          | HNPCC4, PMSL2       | ENSG00000122512 |
| PTPN12     | 5782          | PTPG1               | ENSG00000127947 |
| PTPRJ      | 5795          | DEP1                | ENSG00000149177 |
| SLC26A3    | 1811          | CLD, DRA            | ENSG00000091138 |
| SRC        | 6714          | SRC1, ASV           | ENSG00000101371 |
| TGFBR2     | 7048          | HNPCC6              | ENSG00000163513 |
| TP53       | 7157          | P53                 | ENSG00000141510 |
