# Supplementary material
Source: PubMed Central journal article supplement (PMC463076)
Supplement: gb-2004-5-6-r43-s4.pdf [file gb-2004-5-6-r43-s4.pdf]

## Additional Data File 4

### Biological Background

The data set consisted of 350 genes that were upregulated in pleiomorphic adenoma of the salivary glands of mice compared to normal mice. These adenoma are benign **epithelial tumours** of the salivary glands. Microscopically, they show a marked histological diversity with **epithelial** and **mesenchymal** components in a variety of patterns. They form in the cartilage and consist mainly of **fibroblasts**. They are the result of recurrent chromosome rearrangements, particularly reciprocal translocations, with breakpoints at 8q12, 3p21 and 12q13-15. It was demonstrated that the t(3;8)(p21;q12) translocation results in promoter swapping between PLAG1, a **developmentally** regulated **zinc finger** gene and the constitutively expressed gene for beta-catenin (CTNNB1), a protein functioning in the **WG/WNT** signalling pathway and specification of cell fate during **embryogenesis**. The promoter swapping leads to activation of PLAG1 expression and reduced expression of CTNNB1 [1]. In normal conditions, PLAG1 is expressed in **placenta** and **fetal** tissues, with no detectable expression in adult salivary glands [2]. The abnormal PLAG1 expression in the adenoma results in deregulation of PLAG1 target genes causing salivary gland tumorigenesis [4]. The main target of PLAG1 was identified as the insulin-like growth factor II (**IGF2**) gene [3]. IGF2 perfectly fits in the picture of a restarted **developmental** program with concomitant loss of **differentiation**, the typical hallmark for any tumour [4]. Furthermore, glial **intermediate filament** proteins [10] coexpressed with various **keratins** such as cytokeratin 14 [5] and cytokeratin 18, a known suppressor of **apoptosis** [6], were found to be effective markers of this type of **tumours**. Additionally, **proteoglycans** [9], **collagen** and glycosaminoglycans such as **chondroitin-sulfate**, were found characteristic for pleiomorphic adenoma and are thought to influence the proliferation, **differentiation**, secretory activity and shape of these **tumour** cells [7]. It was also indicated that oncogene **p53** is mutated in these cells and may serve as a **tumour** marker [8].

## TXTGate profiles

| GENERIF-GO  |         |                |          | Medline-eVOC    |         |                |          |
|-------------|---------|----------------|----------|-----------------|---------|----------------|----------|
|             | mean    |                | variance |                 | mean    |                | variance |
| express     | 0.08172 | express        | 0.01339  | organ           | 0.28121 | organ          | 0.01383  |
| cell        | 0.05138 | keratin        | 0.01087  | intern          | 0.15775 | intern         | 0.00672  |
| develop     | 0.04191 | develop        | 0.00899  | normal          | 0.15710 | growth         | 0.00599  |
| function    | 0.04129 | frameshift     | 0.00866  | red             | 0.13482 | development    | 0.00455  |
| activ       | 0.03759 | pattern        | 0.00752  | male            | 0.12830 | fibroblast     | 0.00449  |
| regul       | 0.03753 | embryogenesi   | 0.00719  | femal           | 0.12795 | tumour         | 0.00391  |
| induc       | 0.03283 | phosphoryl     | 0.00660  | visual          | 0.11712 | red            | 0.00386  |
| pathwai     | 0.02807 | elem           | 0.00648  | capillari       | 0.11152 | nucleu         | 0.00378  |
| interact    | 0.02678 | induc          | 0.00589  | system          | 0.11027 | normal         | 0.00373  |
| protein     | 0.02563 | embryon        | 0.00579  | optic           | 0.10717 | embryo         | 0.00358  |
| gene        | 0.02375 | function       | 0.00577  | retina          | 0.10631 | teratoma       | 0.00347  |
| respons     | 0.02365 | apoptosi       | 0.00551  | viral           | 0.09760 | depend         | 0.00339  |
| region      | 0.02347 | cell           | 0.00541  | bacteri         | 0.09706 | stem_cell      | 0.00337  |
| modul       | 0.02270 | direct         | 0.00536  | adult           | 0.07234 | kidnei         | 0.00321  |
| signal      | 0.02263 | enhanc         | 0.00534  | chain           | 0.06789 | epithelium     | 0.00303  |
| apoptosi    | 0.02195 | interact       | 0.00518  | cell            | 0.04885 | visual         | 0.00300  |
| site        | 0.02114 | regul          | 0.00502  | growth          | 0.04799 | multipl        | 0.00298  |
| pattern     | 0.02071 | region         | 0.00492  | tissu           | 0.04328 | skin           | 0.00294  |
| increas     | 0.02001 | activ          | 0.00487  | development     | 0.03822 | muscl_cell     | 0.00286  |
| direct      | 0.01981 | helicas        | 0.00481  | metabol         | 0.03736 | system         | 0.00271  |
| inhibit     | 0.01918 | heart          | 0.00475  | embryo          | 0.03675 | capillari      | 0.00269  |
| control     | 0.01909 | mechan         | 0.00472  | fibroblast      | 0.03272 | mammari        | 0.00269  |
| embryon     | 0.01908 | excretion      | 0.00455  | tumour          | 0.03180 | type_ii        | 0.00269  |
| mechan      | 0.01818 | modul          | 0.00454  | depend          | 0.03009 | bacteri        | 0.00266  |
| effect      | 0.01787 | effect         | 0.00449  | genet           | 0.02810 | male           | 0.00260  |
| level       | 0.01781 | increas        | 0.00446  | alpha           | 0.02809 | small          | 0.00260  |
| result      | 0.01769 | antibodi       | 0.00437  | brain           | 0.02804 | viru           | 0.00259  |
| brain       | 0.01768 | tissu          | 0.00431  | kidnei          | 0.02621 | femal          | 0.00258  |
| enhanc      | 0.01761 | copper         | 0.00429  | multipl         | 0.02396 | trophoblast    | 0.00256  |
| tissu       | 0.01739 | target         | 0.00426  | nucleu          | 0.02074 | testi          | 0.00253  |
| tumor       | 0.01660 | transform      | 0.00426  | lung            | 0.02061 | optic          | 0.00238  |
| promot      | 0.01653 | absorpt        | 0.00414  | liver           | 0.02052 | pool           | 0.00237  |
| earli       | 0.01627 | gene           | 0.00413  | primari         | 0.01981 | retina         | 0.00234  |
| target      | 0.01627 | pathwai        | 0.00403  | multipl_scleros | 0.01943 | chain          | 0.00232  |
| import      | 0.01598 | chondroitin_su | 0.00403  | muscl_cell      | 0.01905 | brain          | 0.00231  |
| lung        | 0.01582 | tip            | 0.00396  | skin            | 0.01890 | skelet         | 0.00226  |
| involv      | 0.01541 | respons        | 0.00385  | epithelium      | 0.01835 | adipocyt       | 0.00225  |
| bind        | 0.01526 | site           | 0.00376  | heart           | 0.01826 | teratocarcino  | 0.00223  |
| domain      | 0.01496 | dna            | 0.00374  | spleen          | 0.01697 | central_nervc  | 0.00222  |
| mediat      | 0.01474 | relat          | 0.00369  | affect          | 0.01688 | multipl_sclerc | 0.00217  |
| embryogenes | 0.01465 | hnrnp          | 0.00367  | small           | 0.01687 | intermedi      | 0.00217  |
| induct      | 0.01439 | iron           | 0.00364  | neuron          | 0.01610 | neuron         | 0.00216  |
| elem        | 0.01438 | mrna_transcrip | 0.00362  | stem_cell       | 0.01589 | lung           | 0.00214  |
| growth      | 0.01407 | hair           | 0.00355  | diseas          | 0.01553 | heart          | 0.00211  |
| differenti  | 0.01402 | util           | 0.00354  | carcinoma       | 0.01506 | mesoderm       | 0.00206  |
| keratin     | 0.01381 | control        | 0.00354  | skelet          | 0.01504 | macrophag      | 0.00203  |
| depend      | 0.01319 | p53            | 0.00352  | mesoderm        | 0.01433 | placenta       | 0.00203  |

| Medline-MESH      |         |                         |          | Medline-HUGO |         |          |          |
|-------------------|---------|-------------------------|----------|--------------|---------|----------|----------|
|                   | mean    |                         | variance |              | mean    |          | variance |
| encyclopedia      | 0.18233 | encyclopedia            | 0.00652  | cast         | 0.37695 | cast     | 0.03576  |
| reproduc_of_resul | 0.12165 | reproduc_of_result      | 0.00290  | red          | 0.27270 | rod      | 0.01882  |
| gene_librari      | 0.11409 | project                 | 0.00262  | rod          | 0.26967 | red      | 0.01825  |
| project           | 0.10267 | comput_biologi          | 0.00243  | poli         | 0.02181 | poli     | 0.00935  |
| standard          | 0.09417 | gene_librari            | 0.00237  | span         | 0.01945 | marck    | 0.00846  |
| comput_biologi    | 0.09308 | proteoglycan            | 0.00211  | sp1          | 0.01573 | p53      | 0.00480  |
| organ             | 0.09291 | cyclin                  | 0.00185  | e12          | 0.01215 | cd44     | 0.00474  |
| extend            | 0.08998 | extend                  | 0.00175  | p53          | 0.01190 | race     | 0.00456  |
| mous              | 0.08609 | standard                | 0.00172  | marck        | 0.01114 | sp1      | 0.00453  |
| mice              | 0.08307 | organ                   | 0.00152  | abl          | 0.00950 | p19      | 0.00435  |
| rna_cap           | 0.07551 | collagen                | 0.00125  | cat          | 0.00928 | ap_2     | 0.00420  |
| method            | 0.07529 | rna_cap                 | 0.00110  | p19          | 0.00818 | glut     | 0.00399  |
| base              | 0.07374 | monosaccharid_transport | 0.00105  | cap          | 0.00805 | span     | 0.00398  |
| singl             | 0.06920 | keratin                 | 0.00102  | cord         | 0.00791 | zap      | 0.00389  |
| prepar            | 0.06711 | membran_glycoprotein    | 0.00101  | ap_2         | 0.00775 | hnrnp    | 0.00382  |
| imag_cytometri    | 0.06650 | subtract                | 0.00099  | race         | 0.00758 | ptn      | 0.00377  |
| domest_anim       | 0.06393 | immedi_earli_gene       | 0.00097  | trait        | 0.00755 | stat5    | 0.00376  |
| subtract          | 0.06245 | base                    | 0.00097  | ptn          | 0.00742 | ltbp     | 0.00369  |
| frozen_section    | 0.06195 | basem_membran           | 0.00096  | wnt          | 0.00692 | e12      | 0.00351  |
| collect           | 0.06132 | helix_loop_helix_motif  | 0.00096  | ap2          | 0.00662 | id4      | 0.00340  |
| sensit            | 0.06080 | phosphoglycer_kinas     | 0.00093  | ebp          | 0.00657 | cadherin | 0.00333  |
| opsin             | 0.05666 | collect                 | 0.00092  | hnrnp        | 0.00654 | trait    | 0.00330  |
| blue              | 0.05635 | teratoma                | 0.00090  | fat          | 0.00642 | ebp      | 0.00322  |
| sequenc_analysi   | 0.05533 | fetal_develop           | 0.00089  | cadherin     | 0.00640 | adm      | 0.00311  |
| intern            | 0.05509 | imag_cytometri          | 0.00088  | bhlh         | 0.00622 | pit      | 0.00309  |
| specif            | 0.05493 | prepar                  | 0.00083  | stat5        | 0.00612 | ap2      | 0.00305  |
| pick              | 0.05437 | tran_activ              | 0.00082  | erk          | 0.00591 | sre      | 0.00298  |
| genom             | 0.05400 | domest_anim             | 0.00081  | adm          | 0.00586 | gas1     | 0.00295  |
| physic            | 0.05342 | heterogen_nuclear_ribon | 0.00080  | p21          | 0.00576 | wnt      | 0.00285  |
| proport           | 0.05329 | physic                  | 0.00079  | call         | 0.00551 | igfbp    | 0.00285  |
| econom            | 0.05295 | ceruloplasmin           | 0.00078  | glut         | 0.00547 | apc      | 0.00280  |
| dna               | 0.05206 | intern                  | 0.00077  | zap          | 0.00510 | bpag2    | 0.00272  |
| ultraviolet       | 0.05094 | 3t3_cell                | 0.00077  | e10          | 0.00505 | fat      | 0.00264  |
| cone              | 0.05041 | zinc_finger             | 0.00077  | fgf          | 0.00497 | notch1   | 0.00260  |
| pregnanc          | 0.05030 | cytokin                 | 0.00076  | cd44         | 0.00496 | ubc      | 0.00259  |
| rhodopsin         | 0.05018 | frozen_section          | 0.00075  | face         | 0.00479 | cyr61    | 0.00257  |
| develop           | 0.04956 | singl                   | 0.00075  | ndr1         | 0.00473 | rac1     | 0.00257  |
| comparison        | 0.04835 | squalen                 | 0.00075  | il_4         | 0.00470 | bhlh     | 0.00250  |
| care              | 0.04821 | thrombospondin          | 0.00074  | sac          | 0.00464 | arc      | 0.00245  |
| rna               | 0.04784 | dna_bind_protein        | 0.00073  | pdz          | 0.00456 | mpf      | 0.00245  |
| bacteriophag_lam1 | 0.04757 | lactat                  | 0.00072  | il_6         | 0.00454 | tdd5     | 0.00245  |
| tertiari          | 0.04715 | sensit                  | 0.00071  | dmt1         | 0.00446 | net      | 0.00243  |
| sequenc           | 0.04711 | stem_cell_factor        | 0.00070  | 112          | 0.00446 | abl      | 0.00242  |
| cast              | 0.04708 | alpha                   | 0.00070  | sre          | 0.00446 | cap      | 0.00238  |
| genet_model       | 0.04693 | microfila_protein       | 0.00070  | igfbp        | 0.00444 | cord     | 0.00236  |
| reagent           | 0.04680 | mammari                 | 0.00068  | id3          | 0.00440 | ahr      | 0.00230  |
| system            | 0.04672 | immedi_earli_protein    | 0.00068  | met          | 0.00440 | met      | 0.00224  |

| Medline-GO  |         |                         |          | Medline-OMIM |         |              |          |
|-------------|---------|-------------------------|----------|--------------|---------|--------------|----------|
|             | mean    |                         | variance |              | mean    |              | variance |
| project     | 0.15852 | project                 | 0.00634  | sensit       | 0.19887 | sensit       | 0.00839  |
| extend      | 0.14440 | extend                  | 0.00463  | famili       | 0.16792 | famili       | 0.00607  |
| rna_cap     | 0.13473 | rna_cap                 | 0.00383  | chromosom    | 0.15650 | chromosom    | 0.00600  |
| organ       | 0.12202 | organ                   | 0.00265  | dna          | 0.15448 | pick         | 0.00496  |
| sensit      | 0.10797 | sensit                  | 0.00242  | specif       | 0.13607 | dna          | 0.00472  |
| singl       | 0.10722 | singl                   | 0.00212  | blue         | 0.12842 | glycoprotein | 0.00385  |
| accuraci    | 0.08623 | collagen                | 0.00197  | select       | 0.12305 | phosphatas   | 0.00382  |
| rna         | 0.08425 | cyclin                  | 0.00182  | enhanc       | 0.12141 | blue         | 0.00359  |
| pregnanc    | 0.08393 | notch                   | 0.00176  | isol         | 0.11045 | kinas        | 0.00351  |
| intern      | 0.07990 | syndecan                | 0.00174  | cone         | 0.10423 | growth       | 0.00335  |
| develop     | 0.07857 | intern                  | 0.00173  | rod          | 0.10302 | lactat       | 0.00314  |
| biosynthesi | 0.07838 | accuraci                | 0.00162  | sever        | 0.10183 | mammari      | 0.00292  |
| specif      | 0.07605 | myristoyl               | 0.00154  | capillari    | 0.10107 | adhesion     | 0.00290  |
| opsin       | 0.07540 | basem_membran           | 0.00149  | optic        | 0.10037 | skin         | 0.00288  |
| genom       | 0.07538 | keratin                 | 0.00146  | imag         | 0.09782 | induc        | 0.00287  |
| start       | 0.07437 | proteoglycan            | 0.00145  | system       | 0.09037 | fetal        | 0.00285  |
| blue        | 0.07241 | pregnanc                | 0.00142  | doubl        | 0.08944 | alpha        | 0.00282  |
| cone        | 0.06768 | monosaccharid_transp    | 0.00132  | male         | 0.08635 | earli        | 0.00281  |
| rhodopsin   | 0.06734 | protein_tyrosin_phosph  | 0.00130  | femal        | 0.08573 | select       | 0.00281  |
| dna         | 0.06650 | opsin                   | 0.00124  | short        | 0.07868 | membran      | 0.00279  |
| translat    | 0.06589 | cytoskelet_protein      | 0.00124  | long         | 0.07065 | factor       | 0.00272  |
| tertiari    | 0.06589 | p53                     | 0.00123  | cluster      | 0.06595 | pattern      | 0.00241  |
| transcript  | 0.06553 | growth_factor           | 0.00120  | combin       | 0.06409 | rod          | 0.00238  |
| optic       | 0.06498 | lactat                  | 0.00114  | type         | 0.06394 | capillari    | 0.00237  |
| coloni      | 0.06368 | platelet_deriv_growth_f | 0.00113  | adult        | 0.06315 | specif       | 0.00236  |
| select      | 0.06067 | blue                    | 0.00112  | process      | 0.06009 | junction     | 0.00235  |
| enhanc      | 0.06051 | tertiari                | 0.00112  | chain        | 0.05818 | imag         | 0.00231  |
| templat     | 0.05982 | laminin                 | 0.00112  | factor       | 0.04105 | cone         | 0.00230  |
| red         | 0.05901 | casein                  | 0.00111  | tissu        | 0.03925 | kidnei       | 0.00226  |
| rod         | 0.05885 | gestat                  | 0.00111  | growth       | 0.03819 | optic        | 0.00221  |
| branch      | 0.05852 | embryon                 | 0.00111  | acid         | 0.03770 | enhanc       | 0.00219  |
| plant       | 0.05844 | transcript_factor       | 0.00110  | cell         | 0.03761 | respons      | 0.00212  |
| contain     | 0.05786 | dna_bind                | 0.00109  | earli        | 0.03600 | transport    | 0.00209  |
| potenti     | 0.05653 | phosphoglycer           | 0.00104  | bind         | 0.03589 | complex      | 0.00207  |
| system      | 0.05507 | heterogen_nuclear_ribc  | 0.00104  | pattern      | 0.03319 | mesenchym    | 0.00204  |
| visual      | 0.05483 | translat                | 0.00101  | induc        | 0.03268 | brain        | 0.00204  |
| green       | 0.05455 | embryo                  | 0.00099  | membran      | 0.03045 | doubl        | 0.00198  |
| high        | 0.05443 | rna                     | 0.00099  | activ        | 0.03013 | total        | 0.00197  |
| 3_end       | 0.05335 | genom                   | 0.00099  | mai          | 0.02963 | receptor     | 0.00195  |
| integr      | 0.05303 | dystroglycan            | 0.00098  | metabol      | 0.02928 | depend       | 0.00193  |
| cycl        | 0.05271 | rhodopsin               | 0.00097  | respons      | 0.02836 | tumor        | 0.00191  |
| mrna        | 0.05241 | cone                    | 0.00097  | brain        | 0.02650 | multipl      | 0.00188  |
| doubl       | 0.05137 | start                   | 0.00096  | kinas        | 0.02598 | link         | 0.00188  |
| carboxyl    | 0.05134 | zinc                    | 0.00094  | receptor     | 0.02583 | phase        | 0.00187  |
| sever       | 0.05111 | embryon_develop         | 0.00094  | fetal        | 0.02433 | skelet       | 0.00186  |
| 5_end       | 0.05106 | attach                  | 0.00091  | tumor        | 0.02404 | transient    | 0.00185  |
| increas     | 0.05098 | optic                   | 0.00090  | complex      | 0.02401 | inhibitor    | 0.00184  |

| Func-GO           |         |                  |          | GO-GO                  |         |                        |          |
|-------------------|---------|------------------|----------|------------------------|---------|------------------------|----------|
|                   | mean    |                  | variance |                        | mean    |                        | variance |
| protein_fold      | 0.00276 | protein_fold     | 0.00109  | activ                  | 0.10012 | extracellular_space    | 0.03270  |
| saccharomyc       | 0.00255 | saccharomyc      | 0.00092  | extracellular_space    | 0.09947 | membran                | 0.02141  |
| er                | 0.00250 | er               | 0.00089  | membran                | 0.06788 | integr                 | 0.01717  |
| oxid              | 0.00231 | oxid             | 0.00076  | integr                 | 0.05652 | nucleu                 | 0.01502  |
| endoplasm_reticu  | 0.00230 | endoplasm_retic  | 0.00075  | nucleu                 | 0.05203 | extracellular_matrix   | 0.01148  |
| integr_membran_   | 0.00218 | integr_membran   | 0.00068  | regul                  | 0.03824 | atp_bind               | 0.01077  |
| gene              | 0.00192 | transmembran_r   | 0.00057  | atp_bind               | 0.03129 | calcium_ion_bind       | 0.01060  |
| protein           | 0.00184 | characterist     | 0.00036  | dna_bind               | 0.03028 | intracellular_signal_c | 0.00956  |
| involv            | 0.00181 | involv           | 0.00035  | cell_adhesion          | 0.02855 | nucleic_acid_bind      | 0.00911  |
| encod             | 0.00151 | transform        | 0.00034  | dna_depend             | 0.02674 | calmodulin_bind        | 0.00903  |
| similar           | 0.00135 | gene             | 0.00032  | transcript             | 0.02584 | cell_cycl              | 0.00864  |
| transmembran_re   | 0.00115 | protein          | 0.00029  | extracellular_matrix   | 0.02565 | regul                  | 0.00860  |
| characterist      | 0.00092 | similar          | 0.00026  | calcium_ion_bind       | 0.02330 | dna_bind               | 0.00857  |
| transform         | 0.00090 | cellular         | 0.00025  | cell_cycl              | 0.02018 | intermedi_filam        | 0.00841  |
| cellular          | 0.00076 | encod            | 0.00025  | protein_bind           | 0.01889 | cell_adhesion          | 0.00836  |
| homolog           | 0.00075 | homolog          | 0.00024  | cytoskeleton           | 0.01849 | molecular_function_u   | 0.00772  |
| defens            | 0.00069 | defens           | 0.00021  | nucleic_acid_bind      | 0.01779 | dna_depend             | 0.00760  |
| kinas             | 0.00068 | kinas            | 0.00020  | molecular_function_u   | 0.01729 | biolog_process_unkr    | 0.00724  |
| compound          | 0.00068 | compound         | 0.00020  | cell_growth            | 0.01597 | receptor_activ         | 0.00691  |
| resist            | 0.00064 | resist           | 0.00018  | intermedi_filam        | 0.01567 | actin_bind             | 0.00691  |
| membran_associ    | 0.00063 | membran_assoc    | 0.00017  | kinas                  | 0.01510 | transcript             | 0.00670  |
| mrp               | 0.00063 | mrp              | 0.00017  | hydrolas               | 0.01492 | cellular_compon_unl    | 0.00669  |
| atp_bind_cassett  | 0.00063 | atp_bind_casset  | 0.00017  | biolog_process_unkr    | 0.01478 | cell_growth            | 0.00649  |
| abc               | 0.00063 | abc              | 0.00017  | cellular_compon_unk    | 0.01459 | cytoskelet_protein_b   | 0.00645  |
| tap               | 0.00062 | tap              | 0.00017  | translat_regul         | 0.01445 | cytoskeleton           | 0.00630  |
| protein_transport | 0.00061 | protein_transpor | 0.00016  | oxidoreductas          | 0.01423 | translat_regul         | 0.00592  |
| major             | 0.00051 | major            | 0.00011  | intracellular_signal_c | 0.01421 | protein_bind           | 0.00586  |
| membran           | 0.00049 | membran          | 0.00010  | peptidolysi            | 0.01364 | copper_ion_bind        | 0.00579  |
| molecul           | 0.00049 | molecul          | 0.00010  | proteolysi             | 0.01364 | oxidoreductas          | 0.00577  |
| transport         | 0.00048 | transport        | 0.00010  | microfibril            | 0.01345 | lipid_bind             | 0.00541  |
|                   |         |                  |          | extracellular          | 0.01320 | microfibril            | 0.00535  |
|                   |         |                  |          | actin_bind             | 0.01227 | ferrooxidas            | 0.00507  |
|                   |         |                  |          | calmodulin_bind        | 0.01207 | cytoskeleton_organ     | 0.00498  |
|                   |         |                  |          | transferas             | 0.01196 | transferas             | 0.00487  |
|                   |         |                  |          | biogenesi              | 0.01180 | peptidolysi            | 0.00452  |
|                   |         |                  |          | intracellular          | 0.01178 | proteolysi             | 0.00452  |
|                   |         |                  |          | signal_transduct       | 0.01161 | activ                  | 0.00452  |
|                   |         |                  |          | extracellular_matrix_: | 0.01140 | electron_transport     | 0.00452  |
|                   |         |                  |          | cytoskeleton_organ     | 0.01136 | hydrolas               | 0.00448  |
|                   |         |                  |          | transcript_factor      | 0.01101 | heparin_bind           | 0.00448  |
|                   |         |                  |          | structur_molecul       | 0.01055 | growth_factor_bind     | 0.00423  |
|                   |         |                  |          | structur_constitu      | 0.01045 | cytokinesi             | 0.00421  |
|                   |         |                  |          | copper_ion_bind        | 0.01045 | biogenesi              | 0.00420  |
|                   |         |                  |          | receptor_activ         | 0.01032 | cell_cycl_arrest       | 0.00416  |
|                   |         |                  |          | plasma_membran         | 0.01021 | extracellular          | 0.00410  |
|                   |         |                  |          | endopeptidas           | 0.01018 | kinas                  | 0.00408  |
|                   |         |                  |          | peptidas               | 0.01013 | gtp_bind               | 0.00401  |

## References

1. Nat Genet. 1997 Feb;15(2):170-4. Promoter swapping between the genes for a novel zinc finger protein and beta-catenin in pleomorphic adenomas with t(3;8)(p21;q12) translocations. Kas K, Voz ML, Roijer E, Astrom AK, Meyen E, Stenman G, Van de Ven WJ
2. Lab Invest. 1999 May;79(5):583-9. Pleomorphic adenoma gene 1 is expressed in cultured benign and malignant salivary gland tumor cells. Queimado L, Lopes C, Du F, Martins C, Bowcock AM, Soares J, Lovett M.
3. Cancer Res. 2000 Jan 1;60(1):106-13. PLAG1, the main translocation target in pleomorphic adenoma of the salivary glands, is a positive regulator of IGF-II. Voz ML, Agten NS, Van de Ven WJ, Kas K.
4. Verh K Acad Geneesk Belg. 2001;63(1):35-40. Molecular techniques lead to the first insights into the pathophysiology of salivary gland adenomas. Kas K.
5. Appl Immunohistochem Mol Morphol. 2000 Sep;8(3):195-202. Application of immunohistochemistry to the diagnosis of salivary gland tumors. de Araujo VC, de Sousa SO, Carvalho YR, de Araujo NS.
6. Anticancer Res. 2000 Jul-Aug;20(4):2485-7. Immunohistochemical detection of cytokeratin 18 and its neo-epitope in human salivary glands and pleomorphic adenomas. Kusama K, Jiang Y, Ohno J, Shikata H, Ishikawa F, Taguchi K, Kikuchi K, Mori K, Sakashita H, Sakagami H, Kaneko T, Yamamoto Y.
7. J Oral Pathol Med. 1998 Jul;27(6):272-7. Localization of glycosaminoglycans (GAGs) in pleomorphic adenoma (PA) of salivary glands: an immunohistochemical and histochemical evaluation. Zhao M, Takata T, Ogawa I, Miyauchi M, Ito H, Nikai H
8. Virchows Arch. 2002 Nov;441(5):428-36. Epub 2002 Sep 11. Expression profiles of p53, p63, and p73 in benign salivary gland tumors. Weber A, Langhanki L, Schutz A, Gerstner A, Bootz F, Wittekind C, Tannapfel A.
9. J Oral Pathol Med. 1999 Jan;28(1):37-42. Immunohistochemical evaluation of the small and large proteoglycans in pleomorphic adenoma of salivary glands. Zhao M, Takata T, Ogawa I, Yada T, Kimata K, Nikai H.
10. Differentiation. 1986;31(3):206-27. Expression of glial filament protein (GFP) in nerve sheaths and non-neural cells re-examined using monoclonal antibodies, with special emphasis on the co-expression of GFP and cytokeratins in epithelial cells of human salivary gland and pleomorphic adenomas. Achstatter T, Moll R, Anderson A, Kuhn C, Pitz S, Schwechheimer K, Franke WW.
